# Supplementary material for: EBV-EBNA1 constructs an immunosuppressive microenvironment for nasopharyngeal carcinoma by promoting the chemoattraction of Treg cells
Source: PubMed Central journal article supplement — J Immunother Cancer. 2020 Oct 29;8(2):e001588. doi: 10.1136/jitc-2020-001588 (PMC7597532; doi:10.1136/jitc-2020-001588), 2020-10-29
Supplement: jitc-2020-001588supp001.pdf [file jitc-2020-001588supp001.pdf]

**Supplementary Table****Supplementary Table 1. RNA sequence, small interfering RNA target sequence and PCR primer sequence used in this study.**

| gene               | direction                                    | sequence                       | company                      |
|--------------------|----------------------------------------------|--------------------------------|------------------------------|
| miR-200a           | sense                                        | 5'-UAACACUGUCUGGUAACGAUGU-3'   | RiboBio<br>(China)           |
| mimics             | antisense                                    | 5'-UCUUCGUUCCUGUCUGUGUUU-3'    |                              |
| Mimics NC          | sense                                        | 5'-UUUGUACUACACAAAAGUACUG-3'   |                              |
|                    | antisense                                    | 5'-CUGUUCUUUUGUGUUGUUCUUU-3'   |                              |
| miR-200a inhibitor |                                              | 5'-UCUUCGUUCCUGUCUGUGUUU-3'    |                              |
| Inhibitor NC       |                                              | 5'-CUGUUCUUUUGUGUUGUUCUUU-3'   |                              |
| si-CXCL12-001      | Target sequence<br>5'-AGATGCCCATGCCGATTCT-3' |                                |                              |
| si-CXCL12-002      | Target sequence<br>5'-CCATGCCGATTCTTCGAAA-3' |                                |                              |
| si-CXCL12-003      | Target sequence<br>5'-GCCGATTCTTCGAAAGCCA-3' |                                |                              |
| si-c-JUN-001       | Target sequence<br>5'-CCAAGAACGTGACAGATGA-3' |                                |                              |
| si-c-JUN-002       | Target sequence<br>5'-CGCAGCAGTTGCAAACATT-3' |                                |                              |
| si-c-JUN-003       | Target sequence<br>5'-GACCTTATGGCTACAGTAA-3' |                                |                              |
| GAPDH              | Forward                                      | 5'-GTCAGCCGCATCTTCTTT-3'       | Tianyi<br>Huiyuan<br>(China) |
|                    | Reverse                                      | 5'-AGGCTGTTGTCATACTTCTC-3'     |                              |
| c-JUN              | Forward                                      | 5'-GGAGGAAAAAGTGAAAACCTTGAA-3' |                              |
|                    | Reverse                                      | 5'-TTTAAGCTGTGCCACCTGTTCC-3'   |                              |
| CXCL12             | Forward                                      | 5'-CAGCCTGAGCTACAGATGCCC-3'    |                              |
|                    | Reverse                                      | 5'-TTCTTCAGCCGGGCTACAATCT-3'   |                              |
| TGFβ1              | Forward                                      | 5'-TCGCCAGAGTGGTTATCTTT-3'     |                              |

|                |                                                                                                                                                                                                                                                                                             |                              |                    |
|----------------|---------------------------------------------------------------------------------------------------------------------------------------------------------------------------------------------------------------------------------------------------------------------------------------------|------------------------------|--------------------|
|                | Reverse                                                                                                                                                                                                                                                                                     | 5'-TGAACCCGTTGATGTCCACT-3'   |                    |
| SMAD3          | Forward                                                                                                                                                                                                                                                                                     | 5'-CACCAGGATGCAACCTGAAG-3'   |                    |
|                | Reverse                                                                                                                                                                                                                                                                                     | 5'-AACTGGTAGACAGCCTCAAAGC-3' |                    |
| miR200a        | Forward                                                                                                                                                                                                                                                                                     | 5'-CCAGCCTGTGCAGGTGG-3'      | GZSCBio<br>(China) |
| promoter site1 | Reverse                                                                                                                                                                                                                                                                                     | 5'-GGCCAGACTCAGCTTGGG-3'     |                    |
| miR-200a       | Forward                                                                                                                                                                                                                                                                                     | 5'-CCCAAGCTGAGTCTGGCC-3'     |                    |
| promoter site2 | Reverse                                                                                                                                                                                                                                                                                     | 5'-TCCGAGAGCCCCACG-3'        |                    |
| miR200a        | Forward                                                                                                                                                                                                                                                                                     | 5'-CTGCCACACGGGTCTGTC-3'     |                    |
| promoter site3 | Reverse                                                                                                                                                                                                                                                                                     | 5'-CCAGCCTTCTCAGGAACCC-3'    |                    |
| miR200a        | Forward                                                                                                                                                                                                                                                                                     | 5'-GGTGGCGAAGGCCTGTG-3'      |                    |
| promoter site4 | Reverse                                                                                                                                                                                                                                                                                     | 5'-CAAAGGCCACGTCTCCGAG-3'    |                    |
| miR200a        | Forward                                                                                                                                                                                                                                                                                     | 5'-CAGGGCTGCCCACTTCC-3'      |                    |
| promoter site5 | Reverse                                                                                                                                                                                                                                                                                     | 5'-CTGCGGTTTGTGTGTCTGC-3'    |                    |
| miR200a        | Forward                                                                                                                                                                                                                                                                                     | 5'-GATCTGGGGATTAGGACGCTC-3'  |                    |
| promoter site6 | Reverse                                                                                                                                                                                                                                                                                     | 5'-CTCTGTTGGGTCCTGCTCG-3'    |                    |
| GAPDH          | Forward                                                                                                                                                                                                                                                                                     | 5'-GGTTTTACGGGCGCACGT-3'     |                    |
| promoter       | Reverse                                                                                                                                                                                                                                                                                     | 5'-GCTGACTGTGGAACAGGAGG-3'   |                    |
| miR200a        | The miR200a qPCR primers used in this study were proven primers provided by GeneCopoeia and used in conjunction with the all-in-one miRNA qPCR kit produced by GeneCopoeia. The manufacturer refused to provide the sequence information to the customer due to commercial confidentiality. |                              |                    |
| U6             | The U6 qPCR primers used in this study were proven primers provided by GeneCopoeia and used in conjunction with the all-in-one miRNA qPCR kit produced by GeneCopoeia. The manufacturer refused to provide the sequence information to the customer due to commercial confidentiality       |                              |                    |

**Supplementary Table 2. Primary antibodies used in this study.**

| Antibodies                   | Company       | Cat.No. | Dilution             |
|------------------------------|---------------|---------|----------------------|
| Anti-Human CD4 (RPA-T4)-FITC | MultiSciences | AH00401 | 5 $\mu$ l/test(FACS) |

|                                                                        |               |            |                                                                      |
|------------------------------------------------------------------------|---------------|------------|----------------------------------------------------------------------|
| Anti-Human CD25 (BC96)-APC                                             | MultiSciences | AH02505    | 5µl/test(FACS)                                                       |
| Anti-Human CD8a (OKT8)-PerCP-Cy5.5                                     | MultiSciences | AH008A0307 | 5µl/test(FACS)                                                       |
| Anti-Human CD8a (RPA-T8)-PerCP-Cy5.5                                   | MultiSciences | AH008A07   | 5µl/test(FACS)                                                       |
| Anti-Human CD127 (IL-7Ra) (RDR5)-PE                                    | MultiSciences | AH012704   | 5µl/test(FACS)                                                       |
| Anti-Human Foxp3 (236A/E7)-PE                                          | MultiSciences | AH0F04     | 5µl/test(FACS)                                                       |
| Anti-Mouse CD4 (GK1.5)-FITC                                            | MultiSciences | AM00401    | 5µl/test(FACS)                                                       |
| Anti-Mouse CD25 (PC61.5)-APC                                           | MultiSciences | AM02505    | 5µl/test(FACS)                                                       |
| Anti-Mouse CD8a (53-6.7)-PerCP-Cy5.5                                   | MultiSciences | AM008A07   | 5µl/test(FACS)                                                       |
| Anti-Mouse CD127 (IL-7Ra) (A7R34)-PE                                   | MultiSciences | AM012704   | 5µl/test(FACS)                                                       |
| Anti-Mouse Foxp3 (3G3)-PE                                              | MultiSciences | AM0F04     | 5µl/test(FACS)                                                       |
| Mouse anti-Human CD184 (CXCR4) Monoclonal Antibody (12G5)- PE-Cyanine7 | eBioscience   | 25-9999-42 | 5µl/test(FACS)                                                       |
| BV421 Mouse Anti-Human CD184 Clone 12G5(RUO)                           | BD Horizon    | 562448     | 5µl/test(FACS)                                                       |
| BV421 Rat Anti-Mouse CD184 Clone 2B11/CXCR4(RUO)                       | BD Horizon    | 562738     | 5µl/test(FACS)                                                       |
| Asialo GM1                                                             | eBioscience   | 16-6507-39 | 20-50µg/mouse (neutralising)                                         |
| EBV EBNA1                                                              | SANTA CRUZ    | SC-81581   | 1:200(IHC)<br>1:500(WB)                                              |
| FOXP3                                                                  | Affinity      | AF5387     | 1:100(IHC)                                                           |
| TGFβ1                                                                  | abcam         | Ab92486    | 1:200(IHC)<br>1:1000(WB)                                             |
| TGFβ1                                                                  | abcam         | Ab46780    | 1:1000(IF)                                                           |
| TGFβ1                                                                  | abcam         | Ab64715    | 1:1000(WB)<br>2-5µg/ml(neutralising)                                 |
| SMAD3                                                                  | Affinity      | BF0378     | 1:500(IHC)<br>1:1000(IF)<br>1:1000(WB)                               |
| p-SMAD3                                                                | Affinity      | AF3365     | 1:100(IHC)<br>1:500(WB)                                              |
| c-JUN                                                                  | abcam         | Ab31419    | 1:50 (ChIP)<br>1:50(Co-IP)<br>1:400(IHC)<br>1:1000(IF)<br>1:1000(WB) |

|                                                              |             |            |                         |
|--------------------------------------------------------------|-------------|------------|-------------------------|
| c-JUN                                                        | Affinity    | AF6089     | 1:500(WB)               |
| p-c-JUN                                                      | Affinity    | AF3093     | 1:200(IHC)<br>1:500(WB) |
| PI3K                                                         | Proteintech | 60225-1-Ig | 1:1000(WB)              |
| p-PI3K                                                       | Affinity    | AF3241     | 1:500(WB)               |
| AKT                                                          | Proteintech | 10176-2-AP | 1:1000(WB)              |
| p-AKT                                                        | Affinity    | AF0016     | 1:500(WB)               |
| CXCL12                                                       | abcam       | Ab155090   | 1:200(IHC)<br>1:500(WB) |
| CXCL12                                                       | Proteintech | 17402-1-AP | 1:200(IHC)              |
| Goat Anti Chicken IgY<br>H&L(Alexa Fluor 647)<br>preadsorbed | abcam       | Ab150175   | 1:1000(IF)              |
| Alexa Fluor488 AffiniPure<br>Donkey Anti-Rabbit IgG(H+L)     | Yeasen      | 34206ES60  | 1:1000(IF)              |
| Alexa Fluor594 AffiniPure Goat<br>Anti-Mouse IgG(H+L)        | Yeasen      | 33212ES60  | 1:1000(IF)              |

**Supplementary Table 3. Correlation between EBNA1 expression and clinicopathological characteristics in 105 NPC.**

| Clinical characteristics | EBNA1 expression |                 |            | p value | pearson correlation value |
|--------------------------|------------------|-----------------|------------|---------|---------------------------|
|                          | negative (n=3)   | positive(n=102) |            |         |                           |
|                          |                  | low(n=33)       | high(n=69) |         |                           |
| Mean age(years)          | 35               | 45              | 47         | 0.306   | 0.101                     |
| Gender                   |                  |                 |            | 0.908   | -0.011                    |
| Male                     | 3                | 23              | 46         |         |                           |
| Female                   | 0                | 10              | 23         |         |                           |
| EBV-encoded RNA (EBER)   |                  |                 |            | 0.000   | —                         |
| positive                 | 3                | 33              | 69         |         |                           |
| negative                 | 0                | 0               | 0          |         |                           |
| Clinical stage           |                  |                 |            | 0.000   | 0.389                     |
| I                        | 0                | 5               | 4          |         |                           |
| II                       | 0                | 13              | 7          |         |                           |
| III                      | 1                | 8               | 24         |         |                           |
| IV                       | 2                | 7               | 34         |         |                           |
| T classification         |                  |                 |            | 0.003   | 0.290                     |
| T1                       | 0                | 9               | 13         |         |                           |
| T2                       | 0                | 12              | 13         |         |                           |
| T3                       | 1                | 8               | 22         |         |                           |
| T4                       | 2                | 4               | 21         |         |                           |
| N classification         |                  |                 |            | 0.000   | 0.430                     |
| N0                       | 0                | 11              | 6          |         |                           |
| N1                       | 2                | 12              | 20         |         |                           |

|                               |          |          |          |       |        |
|-------------------------------|----------|----------|----------|-------|--------|
| N2                            | 1        | 7        | 26       |       |        |
| N3                            | 0        | 3        | 17       |       |        |
| Distant metastasis            |          |          |          | 0.959 | 0.005  |
| M0                            | 3        | 33       | 67       |       |        |
| M1                            | 0        | 0        | 2        |       |        |
| Recurrence                    |          |          |          | 0.000 | 0.499  |
| Yes                           | 1        | 3        | 23       |       |        |
| No                            | 2        | 30       | 46       |       |        |
| Death                         |          |          |          | 0.000 | 0.414  |
| Yes                           | 0        | 4        | 22       |       |        |
| No                            | 3        | 29       | 47       |       |        |
| Mean survival time (month)    | 110.6667 | 116.1818 | 103.4783 | 0.000 | -0.352 |
| Mean Treg infiltration number | 19       | 44       | 172      | 0.000 | 0.694  |
| TGFβ1 expression              |          |          |          | 0.000 | 0.630  |
| low or negative expression    | 2        | 11       | 2        |       |        |
| high expression               | 1        | 22       | 67       |       |        |
| p-SMAD3 expression            |          |          |          | 0.000 | 0.709  |
| low or negative expression    | 2        | 18       | 11       |       |        |
| high expression               | 1        | 15       | 58       |       |        |
| CXCL12 expression             |          |          |          | 0.000 | 0.628  |
| low or negative expression    | 0        | 5        | 1        |       |        |
| high expression               | 3        | 28       | 68       |       |        |
| c-JUN expression              |          |          |          | 0.000 | 0.647  |
| low or negative expression    | 2        | 13       | 4        |       |        |
| high expression               | 1        | 20       | 65       |       |        |
| p-c-JUN expression            |          |          |          | 0.000 | 0.627  |
| low or negative expression    | 3        | 17       | 8        |       |        |
| high expression               | 0        | 16       | 61       |       |        |

**Supplementary Table 4. Correlation between Treg infiltration and clinicopathological characteristics on 105 NPC.**

| Clinical characteristics | Treg infiltration level |            | p value | pearson correlation value |
|--------------------------|-------------------------|------------|---------|---------------------------|
|                          | Low(n=61)               | High(n=44) |         |                           |
| Mean age(years)          | 46                      | 47         | 0.399   | 0.025                     |
| Gender                   |                         |            | 0.281   | -0.057                    |
| Male                     | 23                      | 34         |         |                           |
| Female                   | 38                      | 10         |         |                           |
| EBV-encoded RNA (EBER)   |                         |            | 0.000   | —                         |
| positive                 | 61                      | 44         |         |                           |
| negative                 | 0                       | 0          |         |                           |
| Clinical stage           |                         |            | 0.000   | 0.373                     |

|                            |          |          |       |        |
|----------------------------|----------|----------|-------|--------|
| I                          | 9        | 0        |       |        |
| II                         | 15       | 5        |       |        |
| III                        | 21       | 12       |       |        |
| IV                         | 16       | 27       |       |        |
| T classification           |          |          | 0.020 | 0.202  |
| T1                         | 15       | 7        |       |        |
| T2                         | 17       | 8        |       |        |
| T3                         | 20       | 11       |       |        |
| T4                         | 9        | 18       |       |        |
| N classification           |          |          | 0.000 | 0.472  |
| N0                         | 17       | 0        |       |        |
| N1                         | 23       | 11       |       |        |
| N2                         | 15       | 19       |       |        |
| N3                         | 6        | 14       |       |        |
| Distant metastasis         |          |          | 0.486 | 0.003  |
| M0                         | 60       | 43       |       |        |
| M1                         | 1        | 1        |       |        |
| Recurrence                 |          |          | 0.000 | 0.325  |
| Yes                        | 9        | 18       |       |        |
| No                         | 52       | 26       |       |        |
| Death                      |          |          | 0.002 | 0.285  |
| Yes                        | 9        | 17       |       |        |
| No                         | 52       | 27       |       |        |
| Mean survival time (month) | 111.7541 | 102.0227 | 0.019 | -0.203 |
| EBNA1 expression           |          |          | 0.000 | 0.694  |
| low or negative expression | 34       | 2        |       |        |
| high expression            | 27       | 42       |       |        |
| TGF $\beta$ 1 expression   |          |          | 0.000 | 0.583  |
| low or negative expression | 15       | 0        |       |        |
| high expression            | 46       | 44       |       |        |
| p-SMAD3 expression         |          |          | 0.000 | 0.643  |
| low or negative expression | 27       | 4        |       |        |
| high expression            | 34       | 40       |       |        |
| CXCL12 expression          |          |          | 0.000 | 0.568  |
| low or negative expression | 6        | 0        |       |        |
| high expression            | 55       | 44       |       |        |
| c-JUN expression           |          |          | 0.000 | 0.593  |
| low or negative expression | 17       | 2        |       |        |
| high expression            | 44       | 42       |       |        |
| p-c-JUN expression         |          |          | 0.000 | 0.557  |
| low or negative expression | 25       | 3        |       |        |
| high expression            | 36       | 41       |       |        |
