# Supplementary material for: EBV-EBNA1 constructs an immunosuppressive microenvironment for nasopharyngeal carcinoma by promoting the chemoattraction of Treg cells
Source: PubMed Central journal article supplement — J Immunother Cancer. 2020 Oct 29;8(2):e001588. doi: 10.1136/jitc-2020-001588 (PMC7597532; doi:10.1136/jitc-2020-001588), 2020-10-29
Supplement: jitc-2020-001588supp002.pdf [file jitc-2020-001588supp002.pdf]

## 1 **Supplementary materials and methods**

### 2 **Patients, tissue specimens and peripheral blood**

3 This study was approved by the Ethics Committee of Nanfang Hospital, Southern Medical  
4 University. One hundred and five NPC patients were recruited in this study. All NPC patients gave their  
5 informed consent to participate in the study. All patients were initially diagnosed by pathology and  
6 received standardized treatment between 2005 and 2009 at Nanfang Hospital, Southern Medical  
7 University, Guangzhou, China. The clinical characteristics of the patients are listed in supplementary  
8 Table 3. All tissue specimens were collected at the time of diagnosis before any treatment and were  
9 immediately frozen in liquid nitrogen.

10 The follow-up data were summarized at the end of December, 2018 at Nanfang Hospital, Southern  
11 Medical University, Guangzhou, China. All patients were evaluated every 2-3 months during the first year,  
12 every 6 months during the second to fifth year and every year thereafter. All follow-up examinations were  
13 performed by physicians who were unaware of this study. Recurrence and death were the primary  
14 endpoints. The time to recurrence was calculated from the date of completion of the treatment to the date  
15 of diagnosis of tumour recurrence. The overall survival was calculated from the date of completion of the  
16 treatment to the date of death or last follow-up.

17 The peripheral blood used in this study was donated by the healthy staff of this research group. All  
18 volunteers gave informed consent to participate this study.

19

### 20 **Cells**

21 Human embryonic kidney 293T cells and mouse hepatoma Hepa1-6 cells were purchased from Cell  
22 Bank of Chinese Academy of Sciences. Human NPC C666-1 (EBV+) cells and hepatocellular  
23 carcinoma HCCLM3 cells were purchased from Shanghai Biological Technology Co., Ltd (Shanghai,  
24 China). The immortalized human nasopharyngeal epithelial cell line NP69 and four human NPC cell  
25 lines, including 5-8F, CNE1, CNE2 and 6-10B, were obtained from the Clinical Research Center of  
26 Nanfang Hospital, Southern Medical University. Human regulatory T (Treg) cells expressing  
27 CD4<sup>+</sup>CD25<sup>+</sup>CD127<sup>low/-</sup> biomarkers were isolated and purified by FACS from the peripheral blood  
28 mononuclear lymphocytes (PBMC) of healthy volunteers. All cells were cultured under standard  
29 conditions.

30

### 31 **Reagents and plasmids**

32 The miR-200a mimics, miR-200a inhibitor, negative control miRNA mimics and negative control  
33 miRNA inhibitor were purchased from RiboBio Co., Ltd. (Guangzhou, China) and used according to the  
34 manufacturer's instruction. All plasmids used in this study were constructed by Genecopoeia Co., Ltd.  
35 (Guangzhou, China) except the dual luciferase reporter vectors carrying wild type or mutated sequences  
36 of the CXCL12 3'UTR, which were constructed by RiboBio. All plasmid sequences were verified by  
37 sequencing. SB431542 and AMD3100 were purchased from Selleck.

38

### 39 **Real time PCR**

40 Total RNA was extracted using RNeasy<sup>®</sup> RT RNA isolation reagent (Genecopoeia), and reverse  
41 transcription and fluorescence quantitative detection were performed using an All-in-One qPCR kit  
42 (Genecopoeia) according to the manufacturer's instruction. miRNA reverse transcription and fluorescence  
43 quantitative detection were performed using an All-in-One miRNA qPCR kit (Genecopoeia) according to  
44 the manufacturer's instruction. GAPDH and U6 genes were used as mRNA and miRNA internal controls,

1 respectively. All tests were performed in triplicate. Please refer to Supplementary Table 1 for the details of  
2 the primer sequences.

3

#### 4 **Immunohistochemistry**

5 Immunohistochemistry was performed to detect the expression of the target genes in tissues using an  
6 All-in-One IHC kit according to the manufacturer's instruction (Beijing zhongshan Jinqiao Biotechnology  
7 Co., Ltd). Please refer to Supplementary Table 2 for detailed description of antibodies.

8 Analysis was performed by two independent pathologists who were blinded to the clinical  
9 outcome. The EBNA1 protein is encoded by the EB virus gene; hence, it is not encoded by the human  
10 genome. Therefore, an all-or-nothing criterion was used to determine whether the tissue sample is  
11 EBNA1-positive or -negative, and a total score system was used to determine the level of EBNA1  
12 expression. The expression level of EBV-EBNA1 was scored as a proportion of immunopositive  
13 staining area multiplied by staining intensity. The proportion of immunopositive staining area was  
14 based on the percentage of positive tumour cells: 0 (0%), 1 (1%-25%), 2 (26%-50%), 3 (51%-75%) or  
15 4(76%-100%). Staining intensity was scored as 0 (negative), 1 (weak), 2 (moderate) or 3 (intense).  
16 Therefore, each case was ultimately considered negative if the total score was 0 and positive if the final  
17 score was  $\geq 1$ . The total score 0 was defined as negative expression of EBNA1 protein and marked with  
18 symbol '-'. The total score from 1 to 3 was defined as low expression of EBNA1 protein and marked  
19 with symbol '+'. The total score  $\geq 4$  were defined as high expression of EBNA1 protein and marked  
20 with symbol '+++'; score  $\geq 4$  was marked with symbol '+++'.  
21

22 The TGF $\beta$ 1, SMAD3, p-SMAD3, c-JUN, p-c-JUN and CXCL12 proteins are encoded by the  
23 human genome. Therefore, a total score system was used to determine the levels of expression of  
24 human proteins. The expression levels of human proteins were scored as proportion of immunopositive  
25 staining area multiplied by staining intensity. The proportion of immunopositive staining area was  
26 based on the percentage of positive tumour cells: 0 (0%), 1 (1%-25%), 2 (26%-50%), 3 (51%-75%) or  
27 4 (76%-100%). Staining intensity was scored as 0 (negative), 1 (weak), 2 (moderate) or 3 (intense).  
28 Therefore, each case was ultimately considered negative expression if the total score was 0 (-), low  
29 expression if the total score was from 1 to 2 ( $\pm$ ) or 3 (+) and high expression if the total score was 4 (+  
30 +) or  $>4$  (+++).

31 The infiltrating lymphocytes around the tumour cells were identified as Treg cells by positive  
32 Foxp3 staining. To grade the Foxp3<sup>+</sup> Treg cells, photomicrographs with 100 positive cells per 400 $\times$   
33 high-power field were acquired and used as a reference for grading. Three representative fields were  
34 selected at 400 $\times$  magnification. The results were counted manually in a single 400 $\times$  microscopic field  
35 for each area of every specimen. Representative areas were considered negative if no Foxp3<sup>+</sup> Treg cells  
36 infiltrated, low density infiltration if less than or equal to 100 positive cells ( $\leq 100$ ) per field were  
37 detected and high density infiltration if more than 100 cells ( $> 100$ ) per field were detected.

38

#### 38 ***In vitro* migration assay of Treg cells**

39 Peripheral blood mononuclear cells (PBMCs) from healthy volunteers were resuspended in PBS  
40 and stained with CD4, CD8, CD25 and CD127 monoclonal antibodies for 15-30 min. CD4 positive,  
41 CD25 positive, CD127 negative or low expression and CD8 negative cells (CD4<sup>+</sup> CD25<sup>+</sup> CD127<sup>low</sup>  
42 CD8<sup>-</sup>) were sorted by flow cytometry and identified as Treg cells. Treg cells ( $1 \times 10^5$ ) were resuspended  
43 in 100  $\mu$ l serum-free medium and were added to the upper chamber of 5- $\mu$ m pore size Transwell inserts  
44 (Corning). The Transwell chambers were then moved to 24-well plates containing 600  $\mu$ l

1 cell-conditioned medium and incubated at 37°C for 4-5 h. Cells were fixed in 4% paraformaldehyde  
2 and stained with 0.1% crystal violet. Migrated cells attached to the lower surface of the chamber  
3 membrane were quantified using 3 random fields. Three independent experiments were performed for  
4 each assay.

5

#### 6 **Animal study**

7 All animal studies complied with the protocols approved by Southern Medical University Animal  
8 Care and Use Committee.

9 (1) Generation of humanized immune reconstitution mouse model of NPC to verify the associations of  
10 EBV-EBNA1, miR-200a and accumulation of Treg cells.

11 Human NPC cells ( $5 \times 10^5$ , negative control group: 5-8F-NC; EBNA1 overexpression group:  
12 5-8F-EBNA1; miR-200a overexpression group: 5-8F-miR-200a; EBNA1 and miR-200a  
13 overexpression group: 5-8F-EBNA1-miR-200a) were injected subcutaneously into the flanks of nude  
14 mice (4-week-old female mice,  $n=5/\text{group}$ ), and tumour growth was measured twice weekly using  
15 calipers (tumour volume was calculated using the equation  $v = (\text{width}^2 \times \text{length})/2$ ). Sixteen days after  
16 tumour transplantation, depletion of NK cells and subsets of monocyte/macrophages was achieved by  
17 intraperitoneal injection of 50  $\mu\text{g}$  of an anti-asialo-GM1 antibody (eBioscience, Cat. 16-6507-39).  
18 Before the end of experiment, repeated injections were necessary if the interval was more than a week  
19 (weekly injections of anti-asialo-GM1 antibody if necessary). At the same time, doxycycline (4  
20  $\text{mg}/\text{kg} \cdot \text{d}$ ) was intragastrically administered daily to prevent infection. After 3 days of NK cell and  
21 monocyte/macrophage depletion, humanize immune reconstitution was performed by tail intravenous  
22 injection of human PBMC, and a total of  $1 \times 10^7$  cells were administered in two injections at 8 h interval  
23 ( $5 \times 10^6$  cells/injection  $\times 2$  injections). After 50-60 h of humanized immune reconstitution, xenografts  
24 were harvested and IHC detection and FACS analysis were performed.

25

26 (2) Generation of humanized immune reconstitution mouse model of NPC to verify the associations of  
27 the TGF $\beta$ 1-SMAD3 axis and accumulation of Treg cells.

28 Human NPC cells ( $5 \times 10^5$ ; 5-8F-EBNA1) were injected subcutaneously into the flanks of nude mice  
29 (4-week-old female mice,  $n=5/\text{group}$ ), and tumour growth was measured twice weekly using calipers  
30 (tumour volume was calculated using the equation  $v = (\text{width}^2 \times \text{length})/2$ ). Five days after tumour  
31 transplantation, SB431542 or PBS (negative control) were injected in the tumours every other day.  
32 Sixteen days after tumour transplantation, depletion of NK cells and subsets of monocyte/macrophages  
33 was achieved by intraperitoneal injection of 50  $\mu\text{g}$  of an anti-asialo-GM1 antibody (eBioscience, Cat.  
34 16-6507-39). Before the end of experiment, repeat injections were necessary if the interval was more  
35 than a week (weekly injections of anti-asialo-GM1 antibody if necessary). At the same time,  
36 doxycycline (4  $\text{mg}/\text{kg} \cdot \text{d}$ ) was intragastrically administered daily to prevent infection. After 3 days of  
37 NK cell and monocyte/macrophage depletion, humanize immune reconstitution was performed by tail  
38 intravenous injection of human PBMC, and a total of  $1 \times 10^7$  cells were administered in two injections at  
39 8 h intervals ( $5 \times 10^6$  cells/injection  $\times 2$  injections). After 50-60 h of humanized immune reconstitution,

1 xenografts were harvested and FACS analysis was performed.

2

3 (3) Generation of humanized immune reconstitution mouse model of NPC to verify the associations of  
4 the CXCL12-CXCR4 axis and accumulation of Treg cells.

5 Human NPC cells ( $1 \times 10^6$ ; 5-8F-EBNA1) were injected subcutaneously into the flanks of nude mice  
6 (4-week-old female mice,  $n=5$ /group), and tumour growth was measured twice weekly using calipers  
7 (tumour volume was calculated using the equation  $v = (\text{width}^2 \times \text{length})/2$ ). Five days after tumour  
8 transplantation, recombinant human CXCL12 protein (1  $\mu\text{g}/\text{kg}$ ; every other day) or AMD3100 (5  
9  $\text{mg}/\text{kg}$  daily) were administered by injection in the tumours. Sixteen days after tumour transplantation,  
10 depletion of NK cells and subsets of monocyte/macrophages was achieved by intraperitoneal injection  
11 of 50  $\mu\text{g}$  of an anti-asialo-GM1 antibody (eBioscience, Cat. 16-6507-39). Before the end of experiment,  
12 repeat injections were necessary if the interval was more than a week (weekly injections of  
13 anti-asialo-GM1 antibody if necessary). At the same time, doxycycline(4  $\text{mg}/\text{kg} \cdot \text{d}$ ) was intragastrically  
14 administered daily to prevent infection. After 3 days of NK cell and monocyte/macrophage depletion,  
15 humanize immune reconstitution was performed by tail intravenous injection of human PBMC, and a  
16 total of  $1 \times 10^7$  cells were administered in two injections at 8 h intervals ( $5 \times 10^6$  cells/injection $\times 2$   
17 injections). After 50-60 h of humanized immune reconstitution, xenografts were harvested and FACS  
18 analysis was performed.

19

20 (4) Generation of humanized immune reconstitution mouse model of human hepatocellular carcinoma  
21 (HCC) to verify the associations of the CXCL12-CXCR4 axis and accumulation of Treg cells.

22 Human HCC cells ( $1 \times 10^6$ ; HCCLM3) were injected into the abdominal cavity of nude mice  
23 (4-week-old female mice,  $n=5$ /group) , and mice weight was measured twice weekly. Five days after  
24 tumour transplantation, recombinant human CXCL12 protein (1  $\mu\text{g}/\text{kg}$ ; every other day) or AMD3100  
25 (5  $\text{mg}/\text{kg}$  daily) were administered by intraperitoneal injection. Sixteen days after tumour  
26 transplantation, depletion of NK cells and subsets of monocyte/macrophages was achieved by  
27 intraperitoneal injection of 50  $\mu\text{g}$  of an anti-asialo-GM1 antibody (eBioscience, Cat. 16-6507-39).  
28 Before the end of experiment, repeat injections were necessary if the interval was more than a week  
29 (weekly injections of anti-asialo-GM1 antibody if necessary). At the same time, doxycycline(4  $\text{mg}/\text{kg} \cdot \text{d}$ )  
30 was intragastrically administered daily to prevent infection. After 3 days of NK cell and  
31 monocyte/macrophage depletion, humanize immune reconstitution was performed by tail intravenous  
32 injection of human PBMC, and a total of  $1 \times 10^7$  cells were administered in two injections at 8 h  
33 intervals ( $5 \times 10^6$  cells/injection $\times 2$  injections). After 50-60 h of humanized immune reconstitution,  
34 xenografts were harvested and FACS analysis was performed.

35

36 (5) Generation of immunocompetent syngeneic mouse model of mouse hepatocellular carcinoma (HCC)  
37 to verify the associations of the CXCL12-CXCR4 axis and accumulation of Treg cells.

38 Mouse HCC cells ( $1 \times 10^6$ ; Hepa1-6) were injected into the abdominal cavity of C57BL/6 mice

1 (4-week-old female mice, n=5/group) and mice weight was measured twice weekly. Five days after  
2 tumour transplantation, recombinant human CXCL12 protein (1 µg/kg; every other day) or  
3 AMD3100(5 mg/kg daily) were administered by intraperitoneal injection. Twenty-one day after tumour  
4 transplantation, xenografts were harvested and FACS analysis was performed.

5

#### 6 **Statistical analysis**

7 All statistical analyses were performed using the Graphpad Prism (version 5.0) statistical software  
8 package except the correlation analysis of clinical samples, which was performed using the SPSS (version  
9 13.0) statistical software package. The Bivariate correlate model and Pearson correlation coefficient were  
10 utilized to evaluate the relationship between EBNA1 expression and clinicopathological characteristics in  
11 NPC patients. The Linear regression model and Pearson correlation coefficient were utilized to evaluate  
12 the relationship between Treg cells infiltration level (the dependent variable) and clinicopathological  
13 characteristics (the independent variables) in NPC patients. Survival analysis was performed using the  
14 Kaplan-Meier method. The Student's t-test was used for comparisons of two independent groups. The  
15 One-way Analysis of Variance (ANOVA) was used for comparisons of multiple groups. The Repeated  
16 Measures of General Linear Model was used for comparisons of tumour growth. A p value of less than  
17 0.05 was considered statistically significant (\*p<0.05; \*\*p<0.01; \*\*\*p<0.001). Data are presented as  
18 mean±SD.  
19
