# Supplementary figures and images for: EBV-EBNA1 constructs an immunosuppressive microenvironment for nasopharyngeal carcinoma by promoting the chemoattraction of Treg cells
Source: PubMed Central journal article supplement — J Immunother Cancer. 2020 Oct 29;8(2):e001588. doi: 10.1136/jitc-2020-001588 (PMC7597532; doi:10.1136/jitc-2020-001588), 2020-10-29

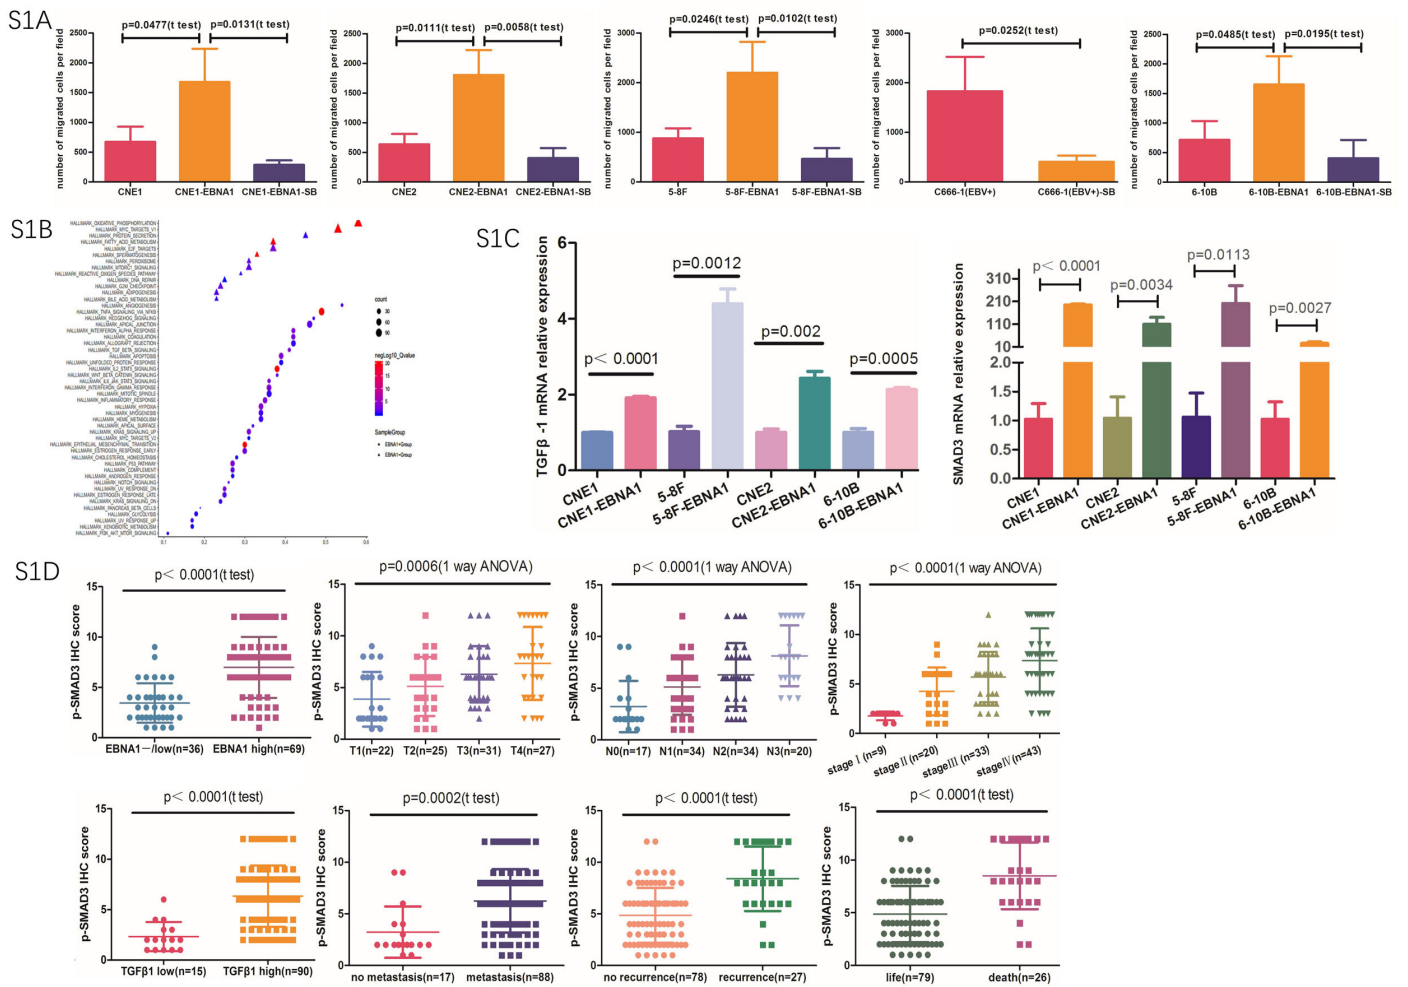

Supplement: jitc-2020-001588supp003.pdf [file jitc-2020-001588supp003.pdf]

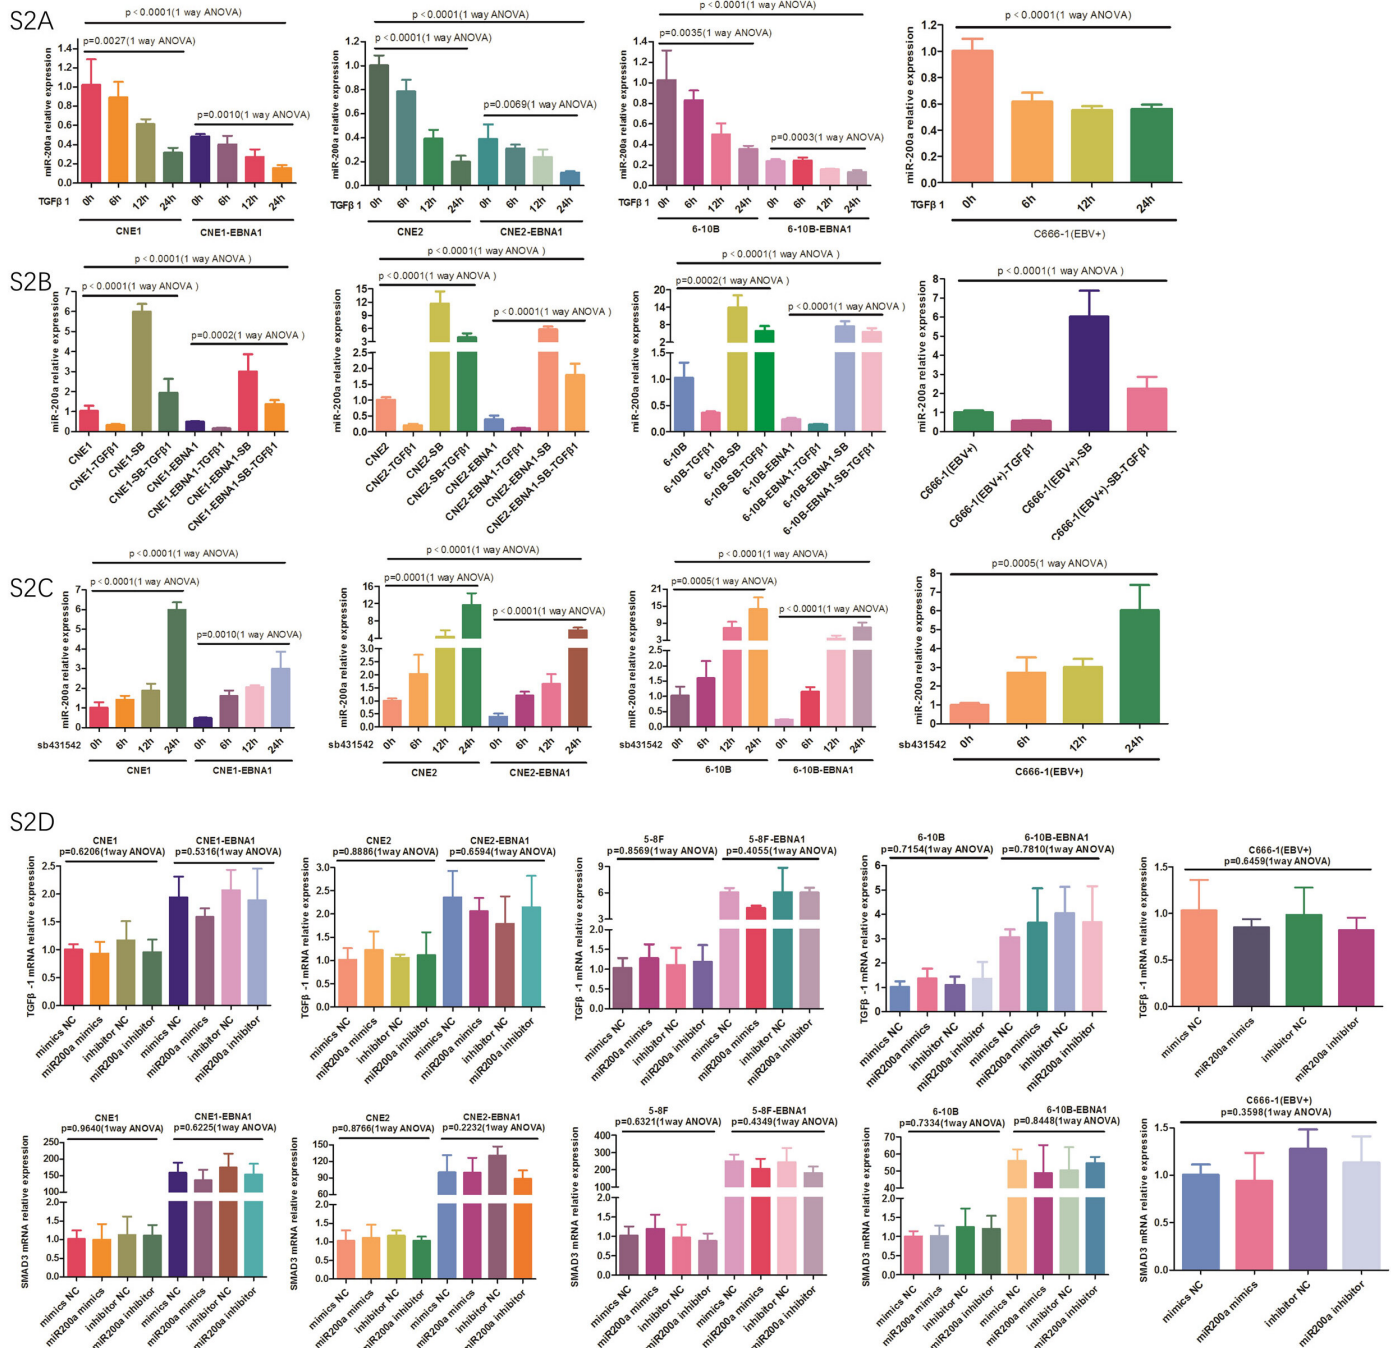

Supplement: jitc-2020-001588supp004.pdf [file jitc-2020-001588supp004.pdf]

S3A

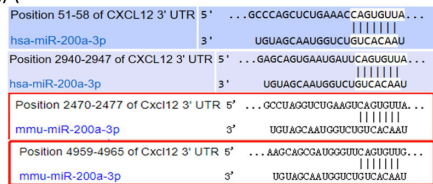

S3C

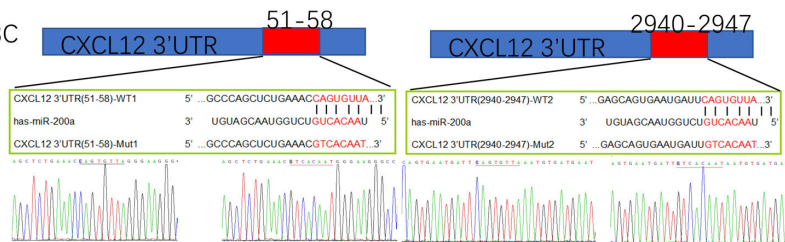

S3B

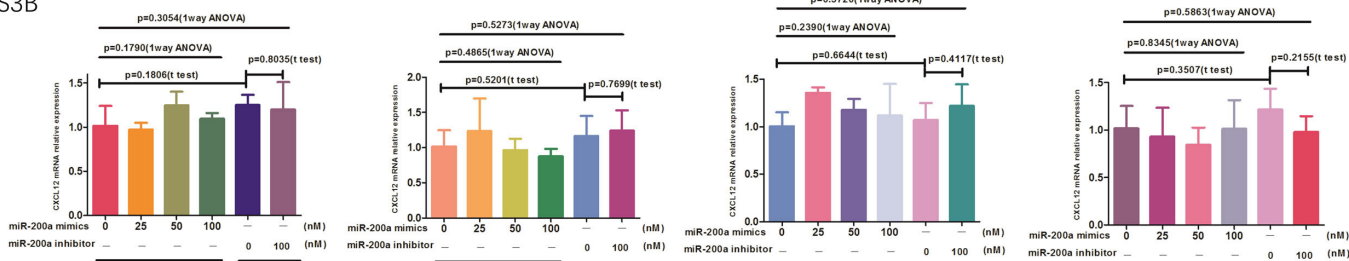

S3D

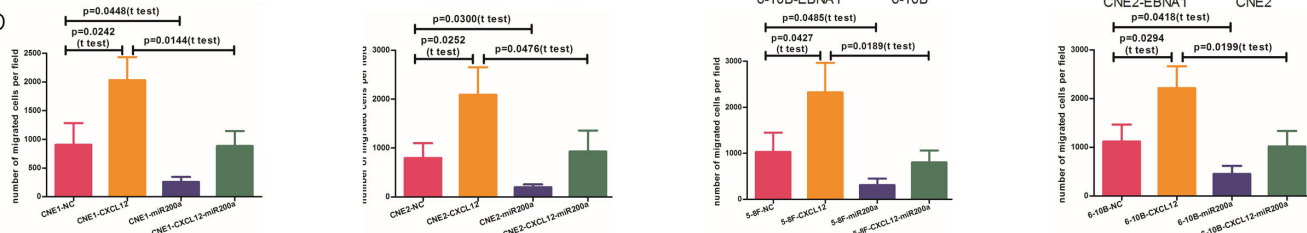

S3E

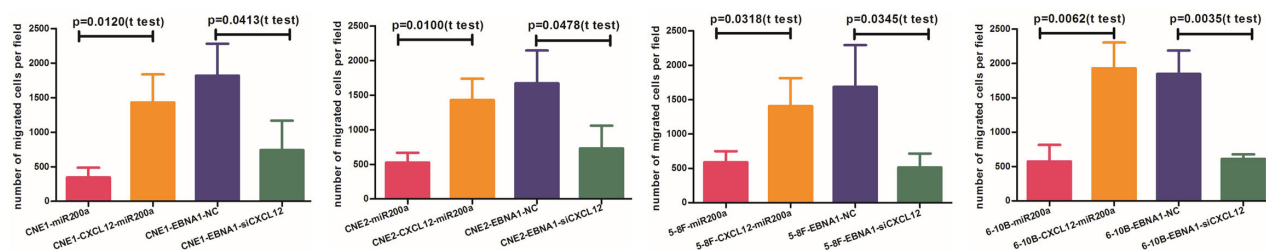

S3F

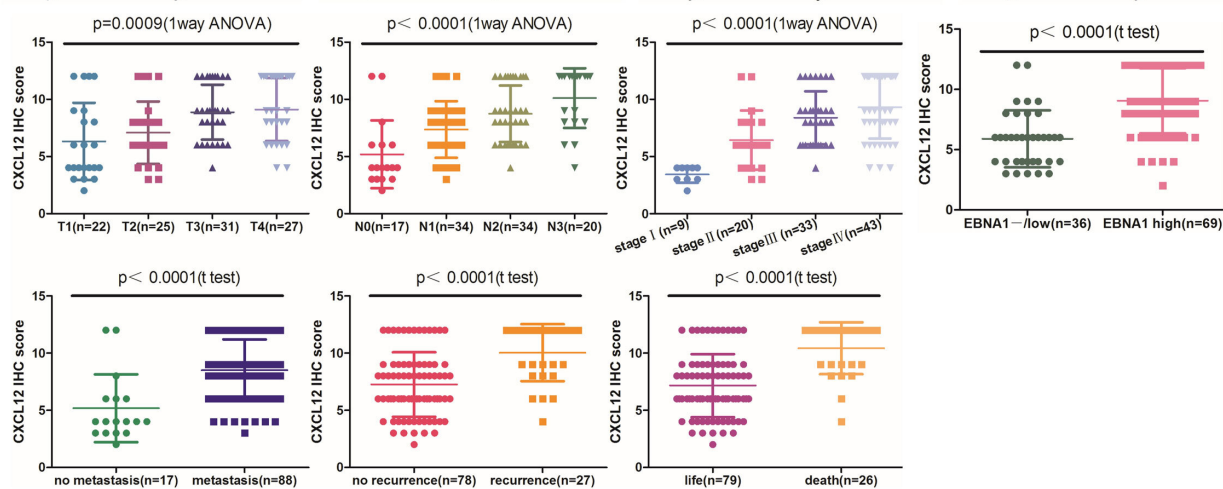

Supplement: jitc-2020-001588supp005.pdf [file jitc-2020-001588supp005.pdf]

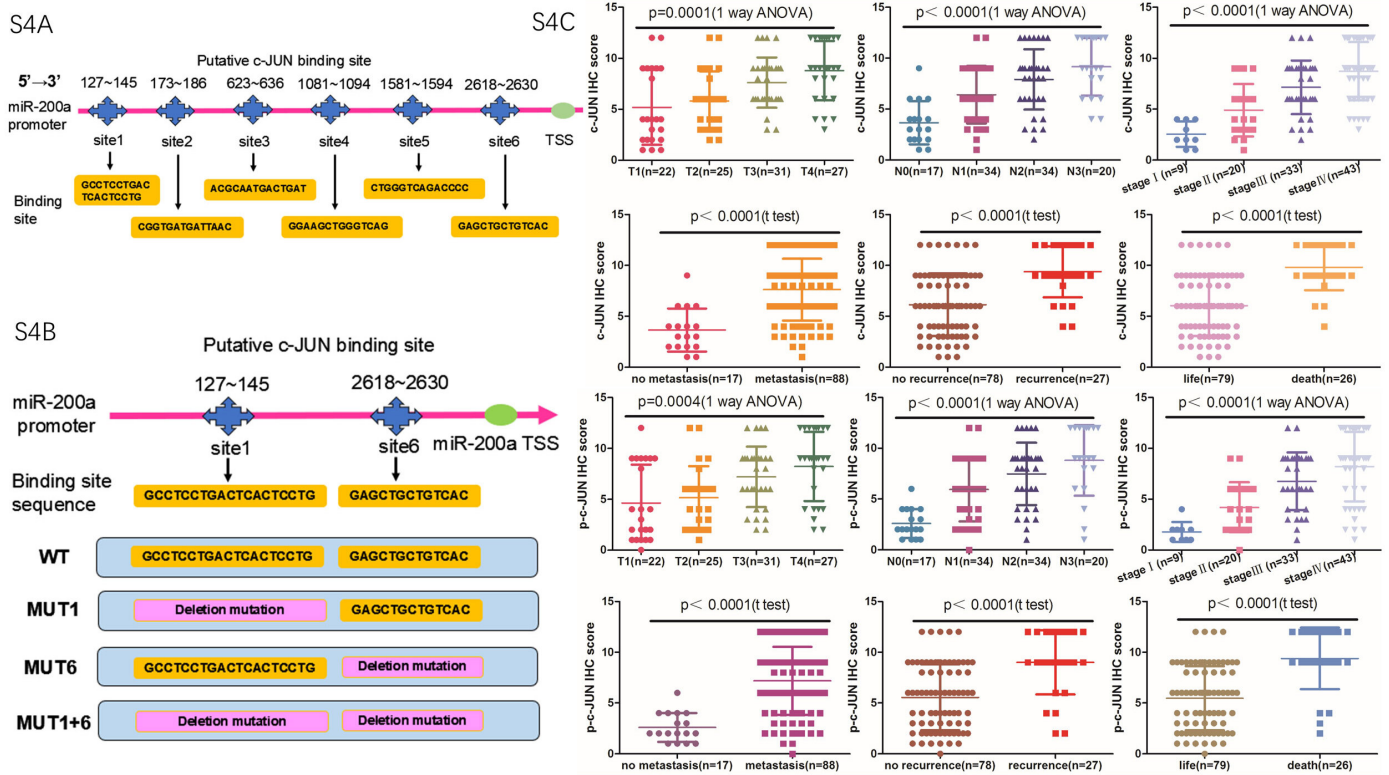

Supplement: jitc-2020-001588supp006.pdf [file jitc-2020-001588supp006.pdf]

S5A

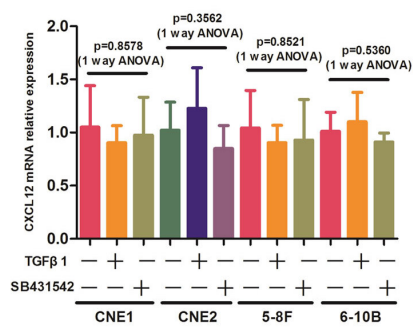

S5B

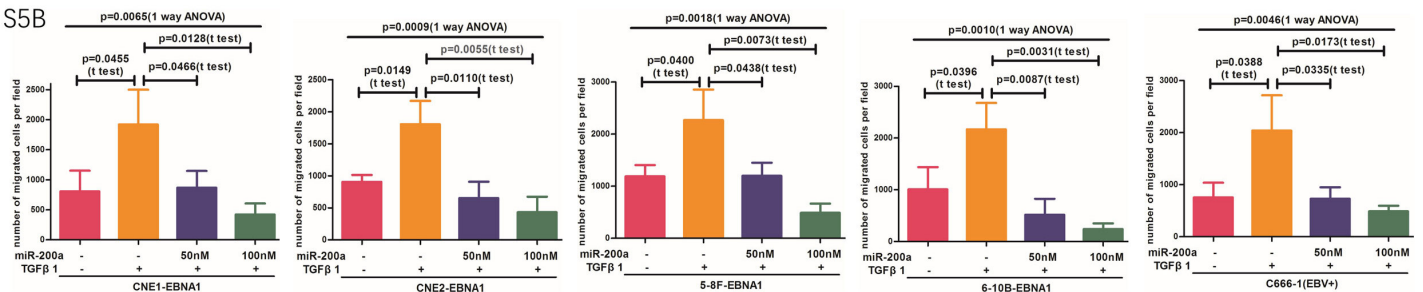

Supplement: jitc-2020-001588supp007.pdf [file jitc-2020-001588supp007.pdf]

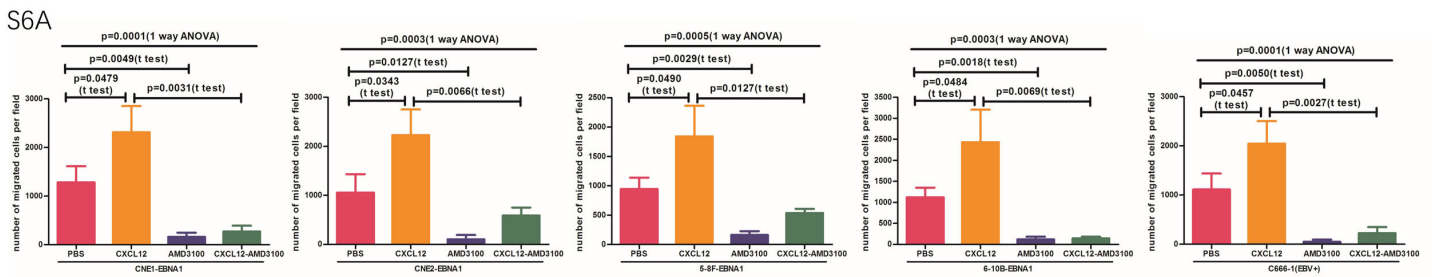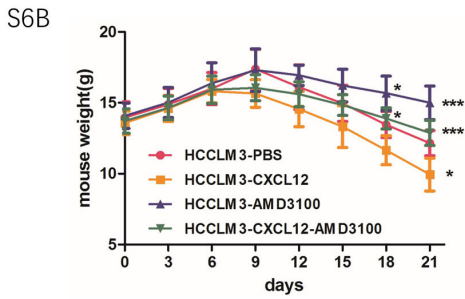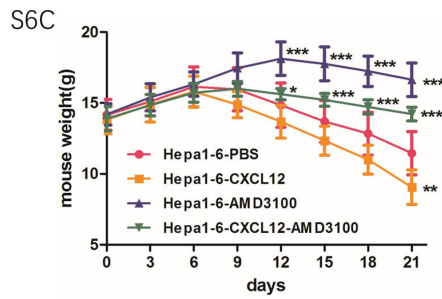

Supplement: jitc-2020-001588supp008.pdf [file jitc-2020-001588supp008.pdf]
